# Supplementary material
Source: HighWire-hosted journal article supplement (https://jnm.snmjournals.org/highwire/filestream/94425/field_highwire_adjunct_files/0/105007_Supplemental_Data.pdf)
Supplement: 105007_Supplemental_Data.pdf [file 105007_Supplemental_Data.pdf]

**FIGURES 1-3:** Clinical data for remaining subjects with partial or complete response by bone scan

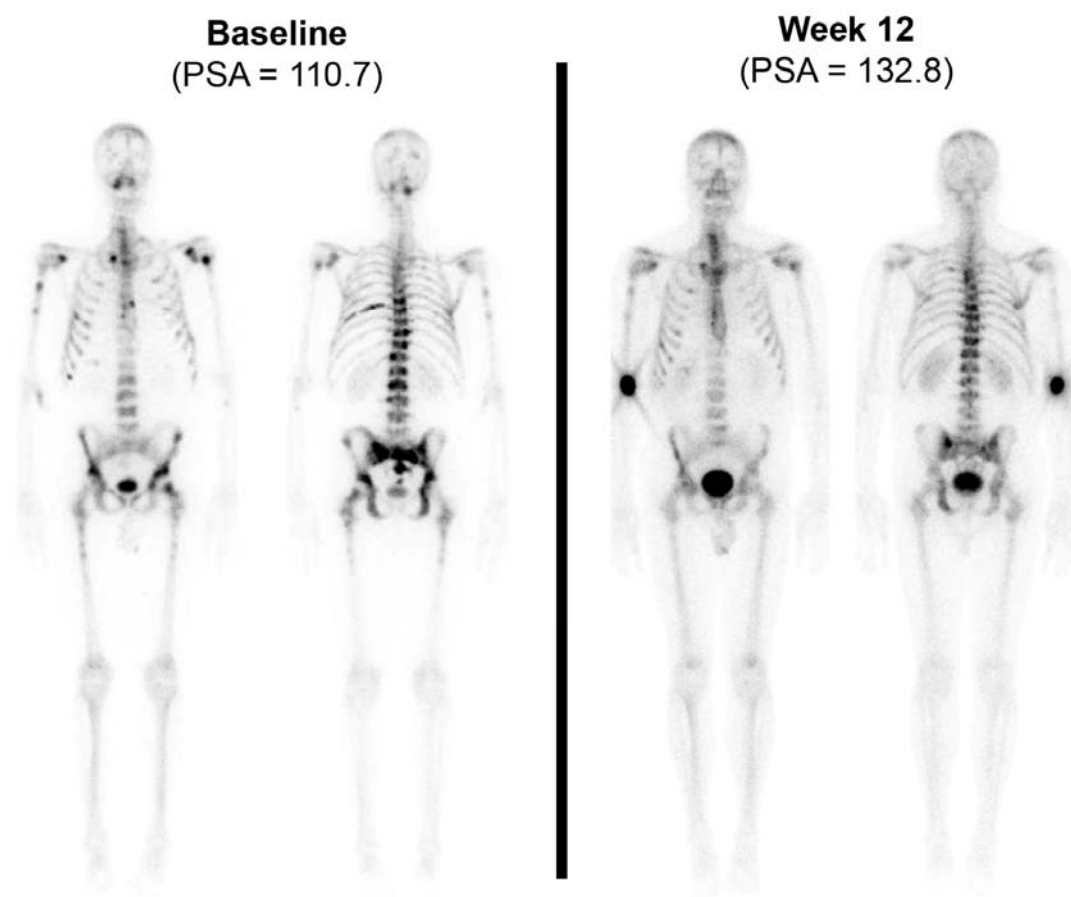

**FIGURE 1:** Significant improvement of bone metastases in bilateral humeri, ribs, vertebrae, pelvic bones, and femora, categorized as partial response. PSA increased by 20%.

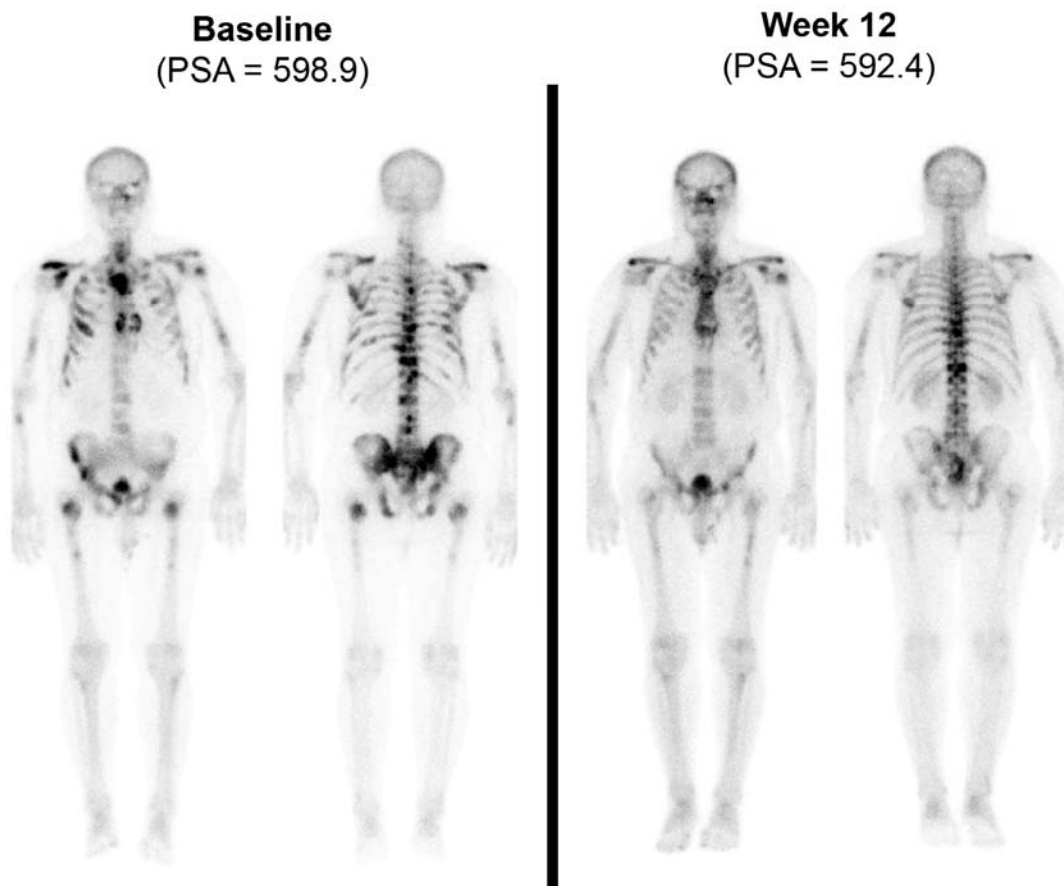

**FIGURE 2:** Marked improvement of bone metastases throughout axial and appendicular skeleton, categorized as partial response. CT scan of the chest/abdomen/pelvis revealed stable disease at a pelvic side wall mass and at metastatic nodes. PSA declined by 1%.

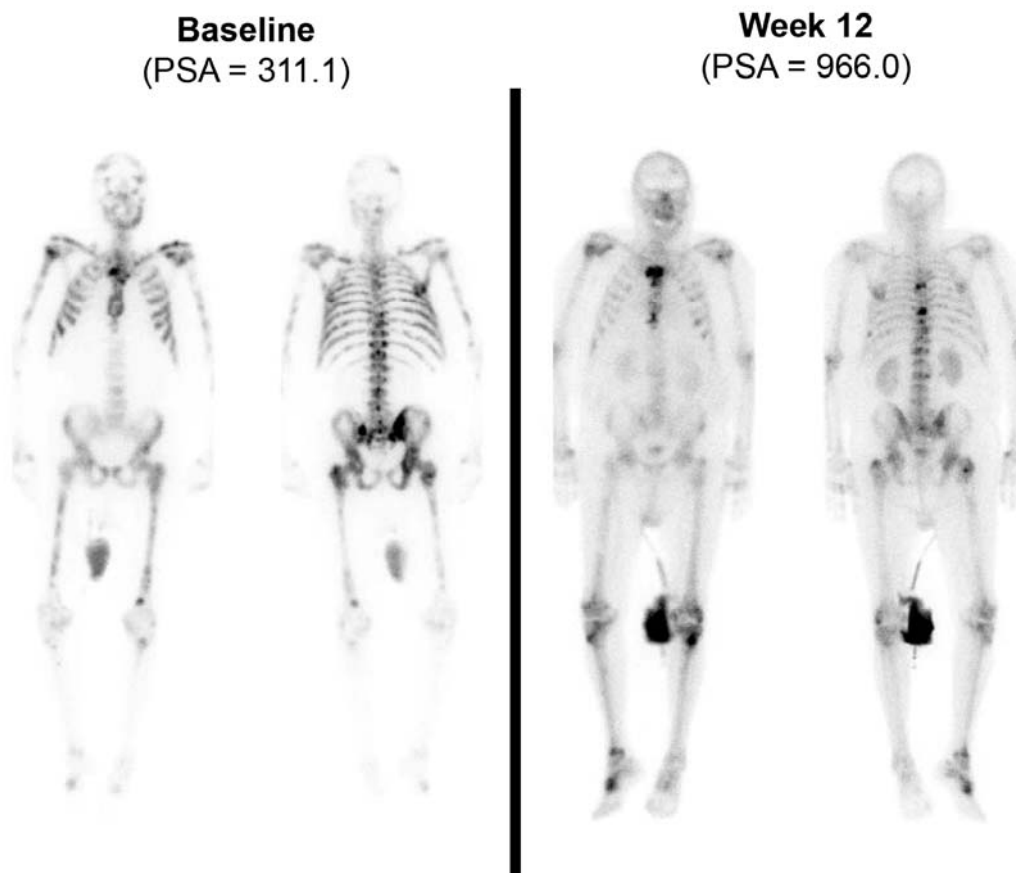

**FIGURE 3:** Prior superscan improved to recognizable individual metastatic lesions of sternum, rib, thoracic spine, pelvic bones, and proximal femora, categorized as partial response. A new liver metastasis was found on CT. PSA increased by 211%.

**TABLE 1:** Patient characteristics for phase II trial of sunitinib for prostate cancer

|                                 | Group A<br>(no prior<br>chemotherapy) | Group B<br>(docetaxel resistant) |
|---------------------------------|---------------------------------------|----------------------------------|
| Number of subjects              | 17                                    | 17                               |
| Age (years)                     |                                       |                                  |
| Median                          | 71                                    | 65                               |
| Range                           | 52-80                                 | 45-84                            |
| ECOG performance status         |                                       |                                  |
| 0                               | 12                                    | 7                                |
| 1                               | 5                                     | 9                                |
| 2                               | 0                                     | 1                                |
| Sites of disease                |                                       |                                  |
| Bone metastasis                 | 12                                    | 15                               |
| PSA-only disease                | 1                                     | 0                                |
| PSA (ng/mL)                     |                                       |                                  |
| Median                          | 51                                    | 44                               |
| Range                           | 7 – 602                               | 8 – 752                          |
| Alkaline phosphatase (U/L)      |                                       |                                  |
| Median                          | 99                                    | 126                              |
| Range                           | 46 – 991                              | 69 – 495                         |
| Hemoglobin (g/dL)               |                                       |                                  |
| Median                          | 13.2                                  | 12.5                             |
| Range                           | 10.7 – 14.9                           | 8.3 – 14.1                       |
| Prior hormone therapies         |                                       |                                  |
| 1-3                             | 11                                    | 12                               |
| 4-6                             | 6                                     | 4                                |
| Prior cycles of<br>chemotherapy | -                                     | 8                                |
| Median                          | -                                     | 3 – 14                           |
| Range                           |                                       |                                  |
| Prior radiation therapy         | 8                                     | 10                               |
| Bisphosphonate use              | 6                                     | 11                               |

**TABLE 2:** In vitro kinase inhibitor activities expressed as IC<sub>50</sub> (nmol/L) values

|              | Sunitinib [nM] | Cabozantinib [nM] |
|--------------|----------------|-------------------|
| VEGFR1/FLT   |                | 12.2              |
| VEGFR2/KDR   | 4              | 0.035             |
| VEGFR3/FLT-4 |                | 6.0               |
| MET          |                | 1.8               |
| PDGFR-beta   | 4, 10          |                   |
| RET          | 50             | 9.8               |
| KIT          | 1-10, 13       | 4.6               |
| FLT3         | 250, 50 (ITD)  | 14.4              |
| TIE2         |                | 14.3              |
| AXL          |                | 7                 |
| CSF-1R       | 50-100         |                   |

IC<sub>50</sub> is the concentration required for 50% target inhibition. KIT is stem cell factor receptor. RET is glial cell-line-derived neurotrophic factor receptor. FLT3 is Fms-like tyrosine kinase-3. All values are as reported in the respective investigator's brochures. Please note that published literature has also reported in vitro inhibitory activity for sunitinib at VEGFR1 and VEGFR3.<sup>1-3</sup>

**References:**

1. Kumar R, Crouthamel MC, Rominger DH, et al. Myelosuppression and kinase selectivity of multikinase angiogenesis inhibitors. *Br J Cancer*. Nov 17 2009;101(10):1717-1723.
2. Manley PW, Bold G, Bruggen J, et al. Advances in the structural biology, design and clinical development of VEGF-R kinase inhibitors for the treatment of angiogenesis. *Biochim Biophys Acta*. Mar 11 2004;1697(1-2):17-27.
3. Roskoski R, Jr. Sunitinib: a VEGF and PDGF receptor protein kinase and angiogenesis inhibitor. *Biochem Biophys Res Commun*. May 4 2007;356(2):323-328.
